# Supplementary material for: Preparation of Thifluzamide Polylactic Acid Glycolic Acid Copolymer Microspheres and Its Effect on the Growth of Cucumber Seedlings
Source: MDPI journal article supplement (doi:10.3390/ijms241210121), 2023-06-14
Supplement: s1 [file s1]

**Preparation of Thifluzamide Polylactic Acid Glycolic Acid Copolymer  
Microspheres and Its Effect on the Growth of Cucumber Seedlings**

Yuanyuan Li<sup>1</sup>, Chaojie Wang<sup>1</sup>, Xile Deng<sup>2</sup>, Runze Cai<sup>1</sup>, Lidong Cao<sup>1</sup>,  
Chong Cao<sup>1</sup>, Li Zheng<sup>1</sup>, Pengyue Zhao<sup>1\*</sup>, Qiliang Huang<sup>1\*</sup>

<sup>1</sup>State Key Laboratory for Biology of Plant Diseases and Insect Pests, Institute  
of Plant Protection, Chinese Academy of Agricultural Sciences,  
Beijing 100193, China

<sup>2</sup>Hunan Agricultural Biotechnology Research Institute, Hunan Academy of  
Agricultural Sciences, Changsha 410125, Hunan, China

\* Correspondence: zhaopengyue@caas.cn (P. Zhao);

qlhuang@ippcaas.cn (Q. Huang)

**Table S1.** Effects of different PVA concentrations on quality technical indexes of PT

| PVA<br>concentration (%) | Loading rate<br>(%) | Encapsulation<br>rate (%) | Particle size<br>(nm) |
|--------------------------|---------------------|---------------------------|-----------------------|
| 0.5                      | 16.29               | 43.17                     | 256.63±1.28           |
| 1                        | 21.4                | 58.92                     | 248.28±1.08           |
| 2                        | 22.5                | 60.73                     | 331.62±7.00           |

**Table S2.** Effects of PLGA concentrations on quality technical indexes of PT

| PLGA<br>concentration<br>(mg/mL) | Loading rate<br>(%) | Encapsulation<br>rate (%) | Particle size<br>(nm) |
|----------------------------------|---------------------|---------------------------|-----------------------|
| 5                                | 32.54               | 21.15                     | 239.42±1.29           |
| 10                               | 27.67               | 19.37                     | 403.44±8.23           |
| 20                               | 22.47               | 46.07                     | 248.28±1.08           |

**Table S3.** Effects of PLGA molecular weight on quality technical indexes of PT

| PLGA<br>molecular weight<br>(Da) | Loading rate<br>(%) | Encapsulation<br>rate (%) | Particle size<br>(nm) |
|----------------------------------|---------------------|---------------------------|-----------------------|
|----------------------------------|---------------------|---------------------------|-----------------------|

|             |       |       |                |
|-------------|-------|-------|----------------|
| 4000-15000  | 21.4  | 58.92 | 248.28±1.08    |
| 10000-20000 | 22.47 | 60.93 | 405.46±5.33    |
| 30000-40000 | 28.69 | 74.59 | 1347.75±475.43 |

**Table S4.** Effects of oil-water ratio on quality technical index of PT

| Oil-water<br>volume ratio<br>(V/V) | Loading rate<br>(%) | Encapsulation<br>rate (%) | Particle size<br>(nm) |
|------------------------------------|---------------------|---------------------------|-----------------------|
| 1:2                                | 20.95               | 62.85                     | 278.49±2.50           |
| 1:4                                | 21.4                | 58.92                     | 248.28±1.08           |
| 1:8                                | 26.96               | 62.01                     | 421.19±5.20           |

**Table S5.** Effects of ultrasonic power on quality technical index of PT

| Ultrasonic power<br>(w) | Loading rate<br>(%) | Encapsulation<br>rate (%) | Particle size<br>(nm) |
|-------------------------|---------------------|---------------------------|-----------------------|
| 65                      | 21.4                | 58.92                     | 248.28±1.08           |
| 104                     | 22.53               | 60.85                     | 264.33±0.47           |
| 130                     | 24.08               | 61.79                     | 279.02±5.04           |

The loading rate and encapsulation rate of thifluzamide PLGA microspheres were calculated according to the following equation:

$$\text{Loading rate (\%)} = \frac{m_1}{m_2},$$

$$\text{Encapsulation rate (\%)} = \frac{m_3}{m_4},$$

$m_1$  is the mass of thifluzamide in the sample,

$m_2$  is the total mass of the sample,

$m_3$  is the actual loaded mass in the sample,

$m_4$  is the theoretical loaded mass in the sample.
